# Supplementary material
Source: PubMed Central journal article supplement (PMC6670041)
Supplement: rcmb.2018-0404LE_anderson_data_supplement.pdf [file rcmb.2018-0404LE_anderson_data_supplement.pdf]

## **SUPPLEMENTARY APPENDIX**

### **Aryl-hydrocarbon receptor repressor gene in primary graft dysfunction after lung transplantation**

Michaela R. Anderson MD MS, Ethan A. Edwin MS, Joshua M. Diamond MD MS,  
Anthony Ferrante Jr MD PhD, Joshua Sonett MD,  
Frank D'Ovidio MD, Selim Arcasoy MD, Edward Cantu III MD,  
Jason D. Christie MD MS, David J. Lederer MD MS

**Table E1:** Characteristics of subjects with reperfusion adipose samples

|                                    | <b>No PGD (n=15)</b> | <b>PGD (n=4)</b> |
|------------------------------------|----------------------|------------------|
| Age                                | 56 (26-69)           | 62 (51-70)       |
| Sex, male                          | 11 (73)              | 4 (100)          |
| Body mass index, kg/m <sup>2</sup> | 25.8 (19.3-31.6)     | 25.0 (19.9-30.2) |
| Diagnosis                          |                      |                  |
| Obstructive Lung Disease           | 4 (27)               | 0 (0)            |
| Cystic Fibrosis                    | 4 (27)               | 0 (0)            |
| Interstitial Lung Disease          | 7 (47)               | 4 (100)          |
| LAS at transplant                  | 38.0 (31.0-94.1)     | 43.4 (30.3-95.0) |
| Donor smoking history              | 2 (13)               | 0 (0)            |
| Pre-operative corticosteroids      | 9 (60)               | 4 (100)          |
| MV at Transplant                   | 0 (0)                | 0 (0)            |
| ECMO before Transplant             | 0 (0)                | 1 (25)           |
| Intra-operative ECMO/CPB           | 6 (40)               | 2 (50)           |
| Total Ischemic Time, minutes       | 321 (179-483)        | 317 (201-480)    |
| Type of Transplant, double         | 8 (53)               | 1 (25)           |

Values presented as N (%) or median (range)

*Definition of abbreviations:* PGD: primary graft dysfunction; LAS: lung allocation score; MV: mechanical ventilation; ECMO: extracorporeal membrane oxygenation; CPB: cardiopulmonary bypass
